# Supplementary material for: Ensuring Efficient Implementation of Lean Construction Projects Using Building Information Modeling
Source: MDPI journal article supplement (doi:10.3390/buildings13030770), 2023-03-15
Supplement: s1 [file s1]

## Supplementary material. Survey Questionnaire Example

Q5. The assessment of the main effects of processes digitalization and the creation of a paperless environment (common data environment)?

|                                                                                                                                                                 | Strongly disagree | Disagree | Neither agree or disagree | Agree | Strongly agree |
|-----------------------------------------------------------------------------------------------------------------------------------------------------------------|-------------------|----------|---------------------------|-------|----------------|
| 1. Acceleration of delivery and acceptance of the works performed                                                                                               |                   |          |                           |       |                |
| 2. Acceleration of interdepartmental interaction and interaction of ICP participants                                                                            |                   |          |                           |       |                |
| 3. Closer integration of federal and regional information systems                                                                                               |                   |          |                           |       |                |
| 4. Increased transparency and consistency of information about the CCP and investment projects                                                                  |                   |          |                           |       |                |
| 5. Increased quality of construction products (by minimizing collisions and errors, optimizing design solutions, minimum corrections in the project)            |                   |          |                           |       |                |
| 6. Decreased construction duration (schedule optimization, plan/actual compliance, getting approvals faster)                                                    |                   |          |                           |       |                |
| 7. Minimization of investment risks (accurate costing, calculation of resources, control in electronic form, reduction of unexpected costs)                     |                   |          |                           |       |                |
| 8. Reduced time and costs for project administration, consulting and support                                                                                    |                   |          |                           |       |                |
| 9. Creation of an interdepartmental legally significant electronic document management with the use of an electronic signature                                  |                   |          |                           |       |                |
| 10. Operational monitoring and control of the implementation of investment projects and programs, the disbursement of financial funds, including budgetary ones |                   |          |                           |       |                |

Q7. What is the average calculated value of Lean digitalization effects?

|                                                                                                                             | 5% | 10% | 15% | 20% | 30% | 40% | 50% |
|-----------------------------------------------------------------------------------------------------------------------------|----|-----|-----|-----|-----|-----|-----|
| Reduction of losses due to the fact                                                                                         |    |     |     |     |     |     |     |
| 1. that the actual cost exceeds the estimated cost                                                                          |    |     |     |     |     |     |     |
| 2. Reduction of losses from exceeding the estimated construction period                                                     |    |     |     |     |     |     |     |
| 3. Reduction of operational losses due to reduction in quality of works and elements                                        |    |     |     |     |     |     |     |
| 4. Reduction of time and operational losses from disruption of resource supplies and increase in the duration of operations |    |     |     |     |     |     |     |
| 5. Reduction of time and operational losses from RFI clarifications                                                         |    |     |     |     |     |     |     |
| 6. Reduction of time inter-operational and operational losses from collisions and design changes                            |    |     |     |     |     |     |     |
